# Supplementary material
Source: PubMed Central journal article supplement (PMC3151690)

## Supplementary Figure Legends

**Supplementary Figure 1.** Ratio of phosphorylated/total protein content of AMPK and ACC from animals treated for 4 weeks with AICAR in inguinal (**A**), retroperitoneal (**B**), and epididymal (**C**) fat pads. Data were pooled from 3 animals for each condition and analyzed using unpaired t-tests. \* $P < 0.05$  versus control. . P values are reported on graphs where trends were observed but did not reach statistical significance.

**Supplementary Figure 2.** Ratio of phosphorylated/total protein content of AMPK and ACC from animals treated for 8 weeks with AICAR in inguinal (**A**), retroperitoneal (**B**), and epididymal (**C**) fat pads. Data were pooled from 3 animals for each condition and analyzed using unpaired t-tests. \* $P < 0.05$  versus control. P values are reported on graphs where trends were observed but did not reach statistical significance.

**Supplementary Figure 3.** Ratio of phosphorylated/total protein content of AMPK and STAT3, and protein content of SOCS3 blots from hypothalami of animals treated with AICAR for 4 (**A**) and 8 weeks (**B**). Data were pooled from 3-4 animals for each condition and analyzed using unpaired t-tests. \* $P < 0.05$  versus control. P values are reported on graphs where trends were observed but did not reach statistical significance.

# Supplementary Figure 1

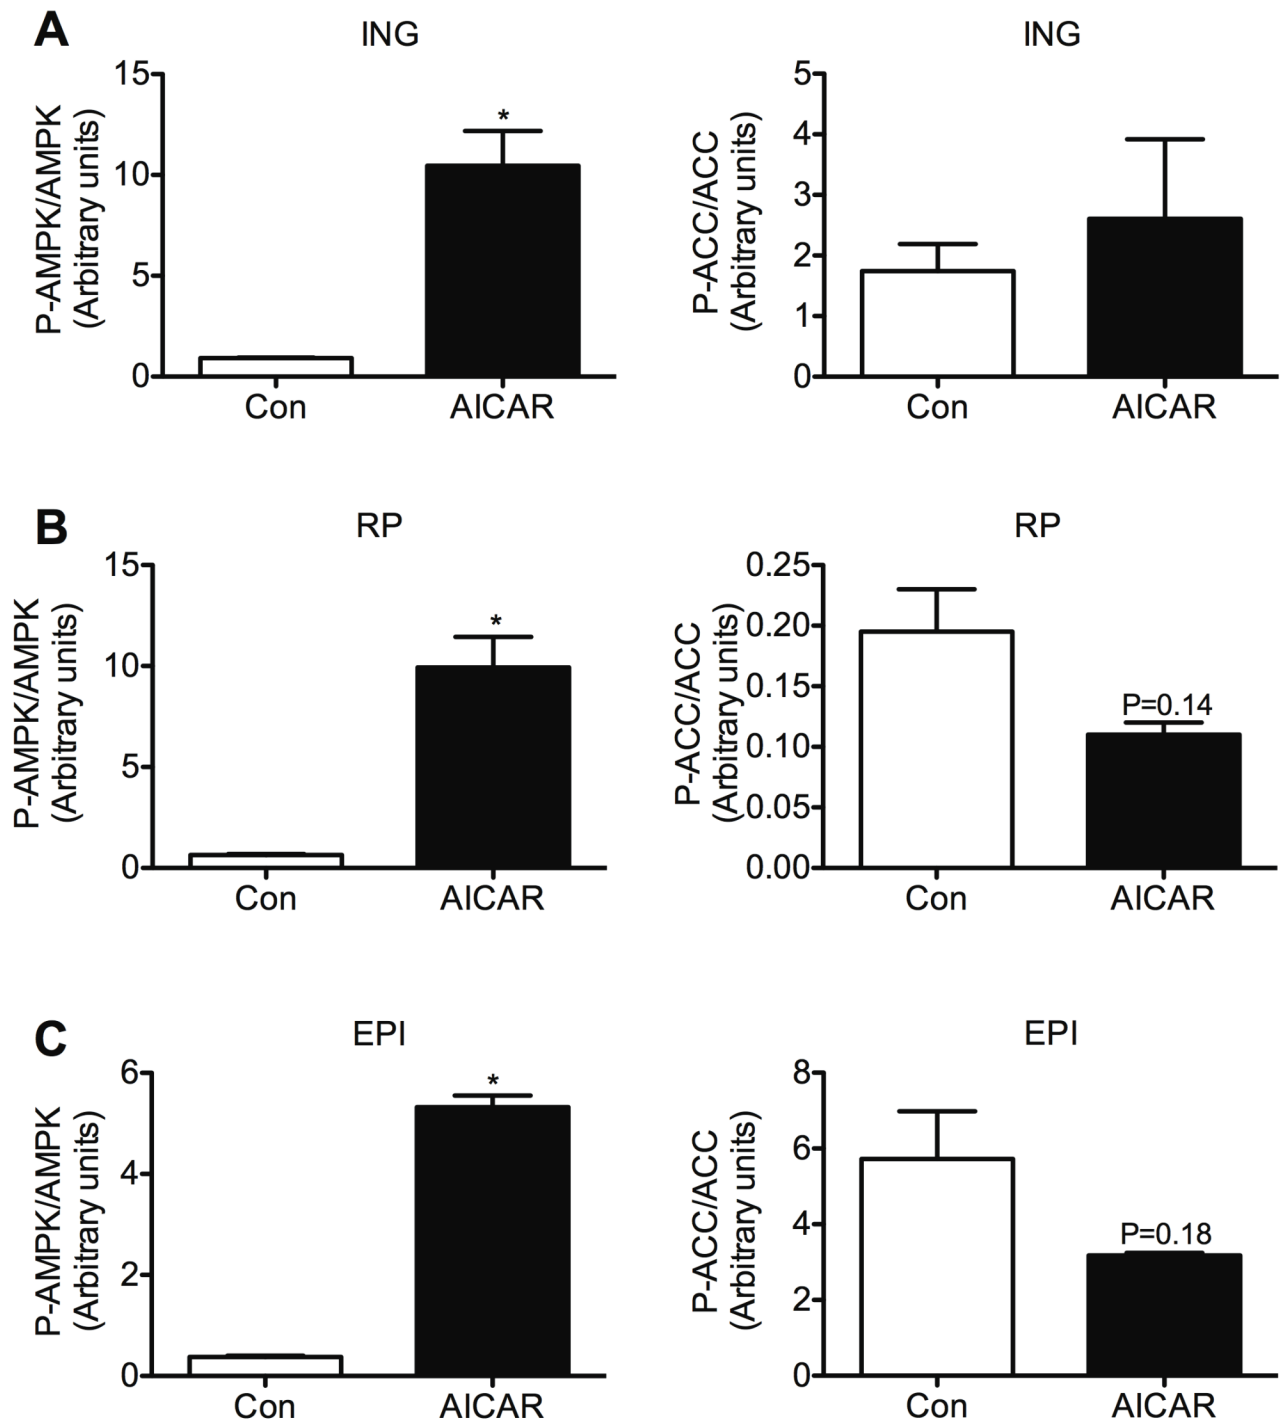

## Supplementary Figure 2

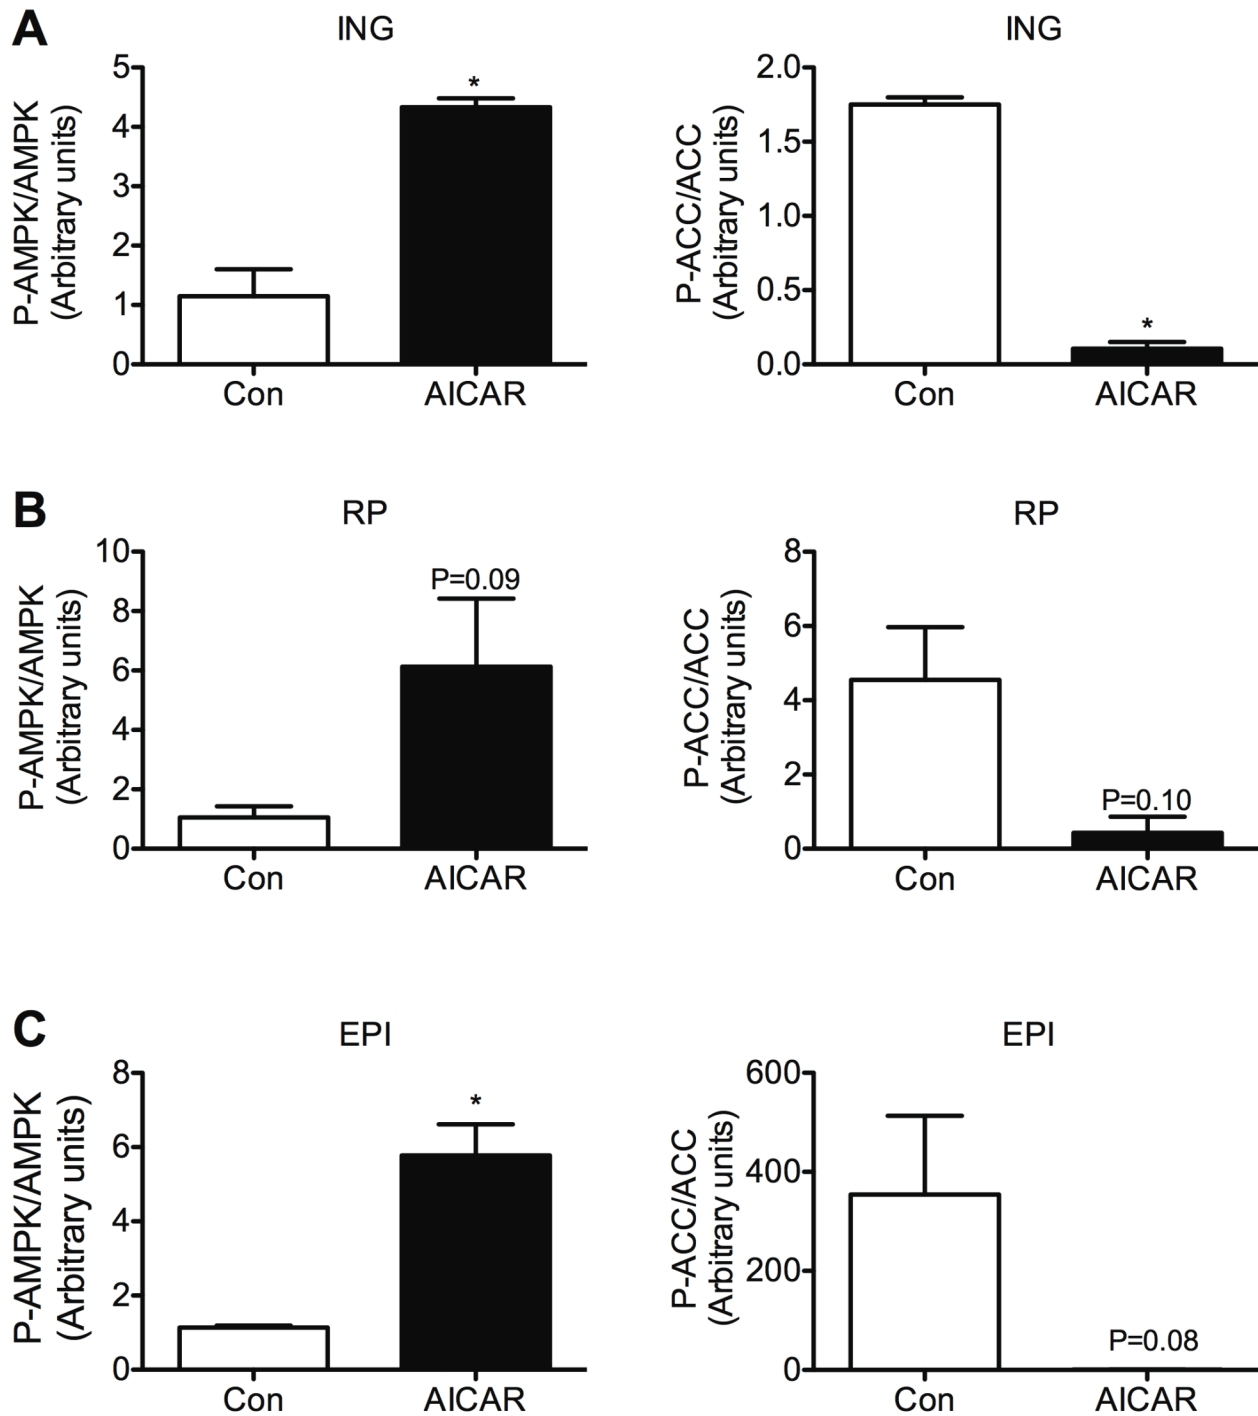

# Supplementary Figure 3

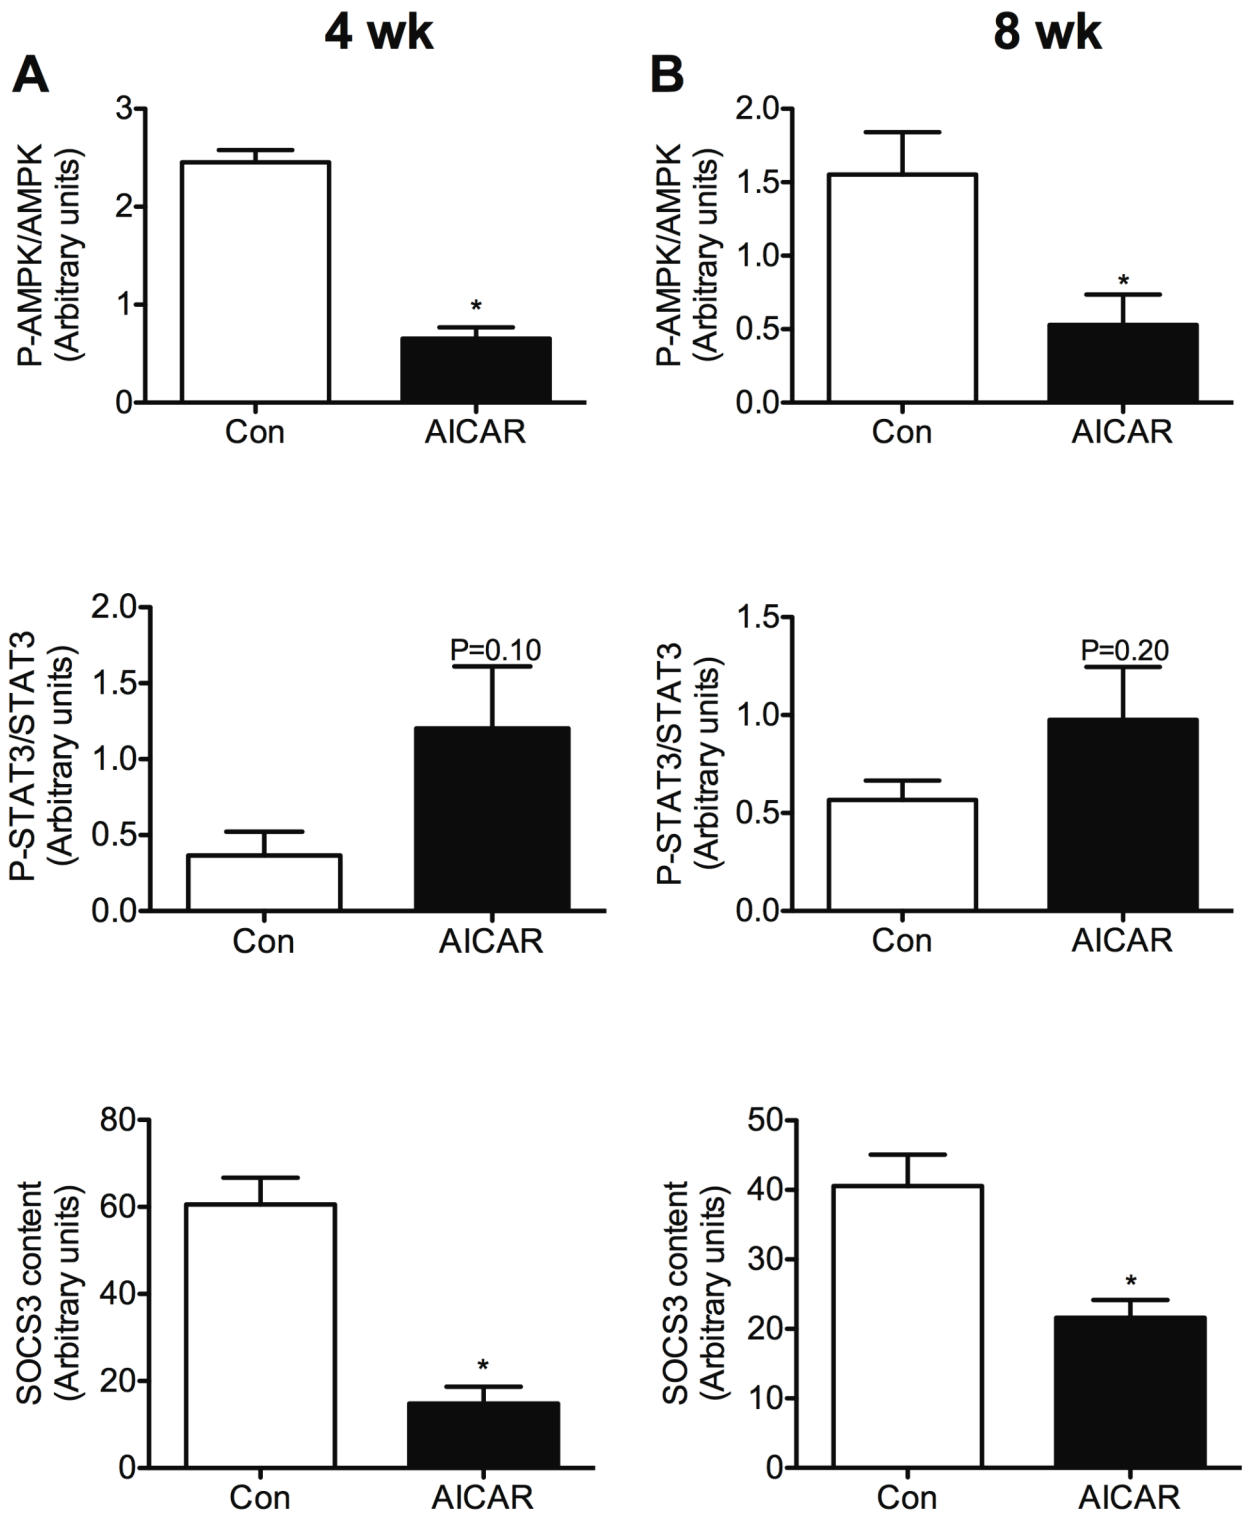

Supplement: supp_M015354_jlr.M015354-1.pdf [file supp_M015354_jlr.M015354-1.pdf]
